# Supplementary material
Source: publisher figshare collection journal article supplement (https://springernature.figshare.com/ndownloader/files/22572725)

**Additional File 1: Frequency of word**


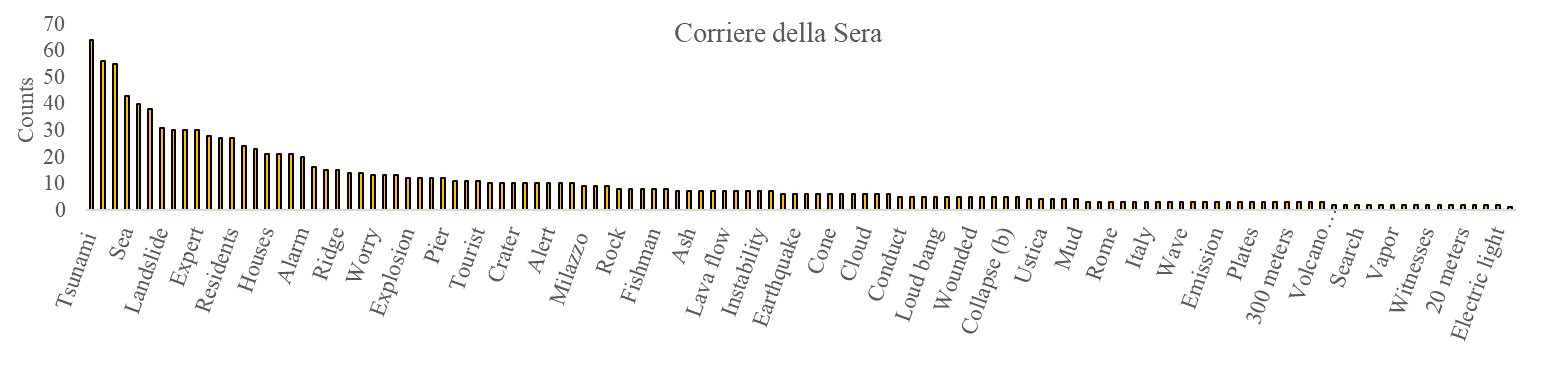

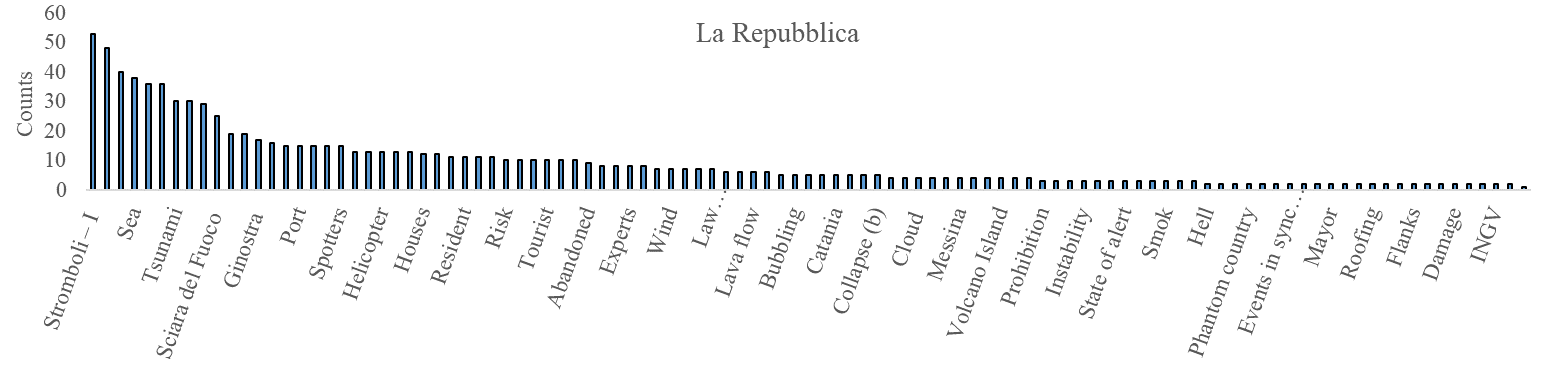

Supplement: Supplementary file 1 [file 22572725]
